# Supplementary material for: Promoting the responsive ability of carbon nanotubes to an external stress field in a polypropylene matrix: A synergistic effect of the physical interaction and chemical linking
Source: Royal Society of Chemistry journal article supplement (doi:10.1039/c1jm14474j), 2012-01-01
Supplement: c1jm14474j.pdf [file c1jm14474j.pdf]

***Supporting information***

**Promoting responsive ability of carbon nanotubes to external stress field in polypropylene matrix: A synergistic effect of physical interaction and chemical linking**

**Yujie Wang<sup>a, b</sup>, Xin Wen<sup>a</sup>, Dong Wan<sup>a, b</sup>, Zhijie Zhang<sup>a</sup>, Tao Tang<sup>\*a</sup>**

*<sup>a</sup> State Key Laboratory of Polymer Physics and Chemistry, Changchun Institute of Applied Chemistry, Chinese Academy of Sciences, Changchun 130022, China.*

*Fax: +86 (0) 431 85262827; Tel: +86 (0) 431 85262004; E-mail: ttang@ciac.jl.cn*

*<sup>b</sup> Graduate School of the Chinese Academy of Sciences, Beijing 100039, China.*

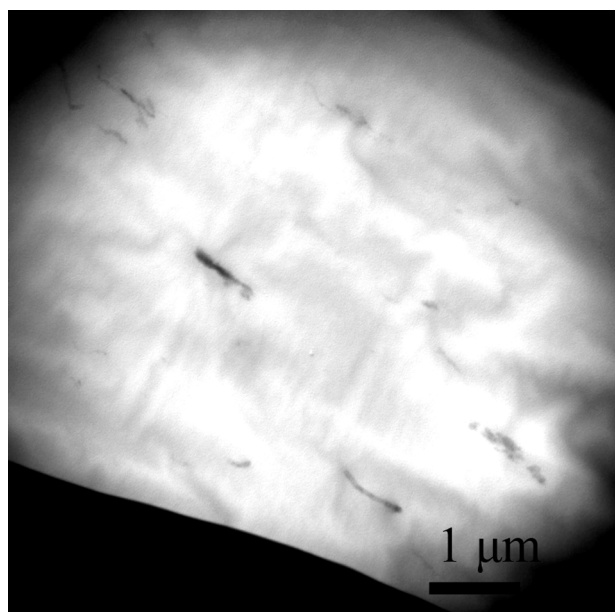

Figure S1 TEM image of PP-g-TBzTD/CNTs composites (0.5 wt% CNTs)

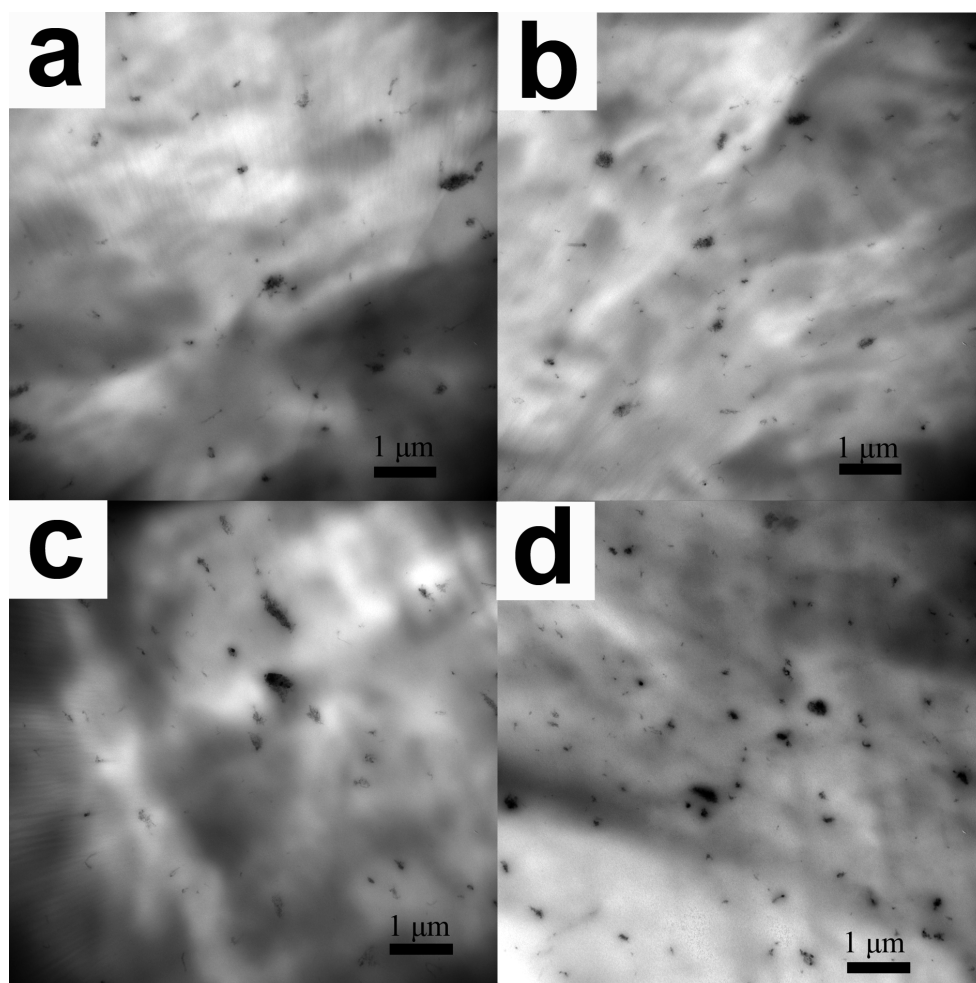

Figure S2 TEM images of PP/CNTs composites (containing 0.5 wt% CNTs and 0.02 wt% DHBP) prepared via melt mixing in the presence of various amount of BA: a) 0.02 wt%; b) 0.04 wt%; c) 0.08 wt%; d) 0.20 wt%.

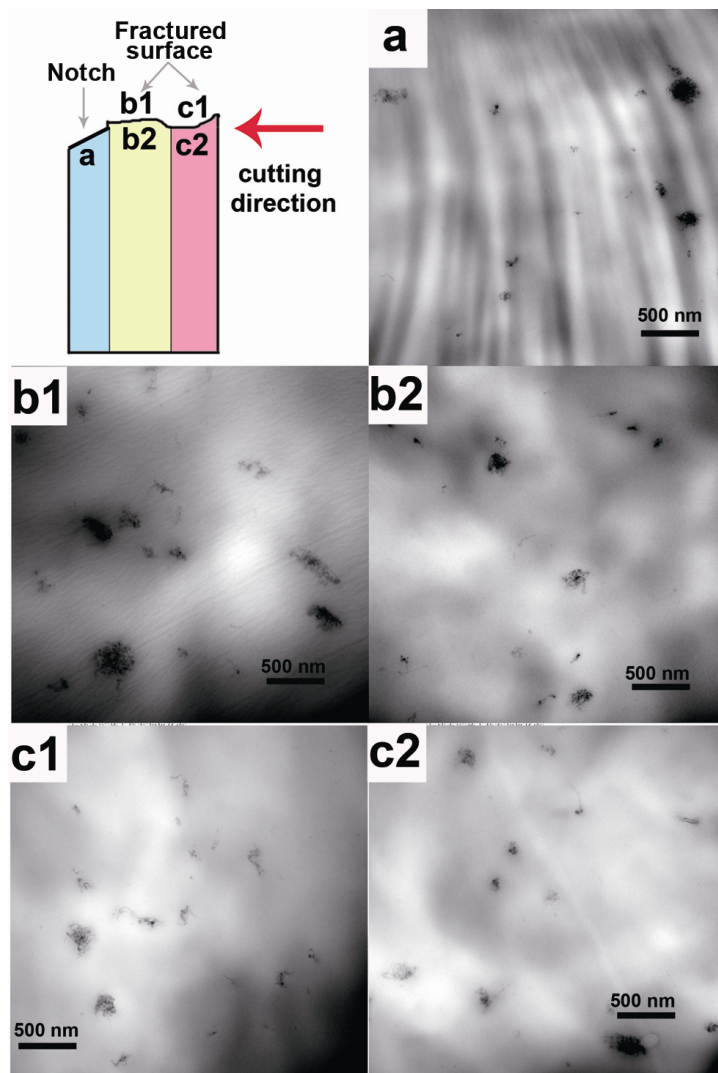

Figure S3 Morphologies of cutting pieces from different positions on the fractured surface of 0.5C0.04M0.02D specimens after impact test. The five TEM images represent un-impact part (a), upper section of fractured surface in the middle region (b1), inside section of fractured surface in the middle region (b2), upper section of fractured surface in the side region (c1) and inside section of fractured surface in the side region (c2).

**Table S1.** The G intensities of PP/CNTs composites at 0° and 90° and their ratios.

| Sample    | G <sub>0</sub> | G <sub>90</sub> | G <sub>0</sub> /G <sub>90</sub> |
|-----------|----------------|-----------------|---------------------------------|
| TB50(150) | 43.23          | 29.49           | 1.47                            |
| TM50(150) | 33.96          | 24.34           | 1.39                            |
| PT50(150) | 30.33          | 26.96           | 1.12                            |
| TB        | 47.47          | 37.30           | 1.27                            |
| TM        | 37.07          | 37.07           | 1.00                            |
| PT        | 28.41          | 28.09           | 1.01                            |
